# Supplementary material
Source: HighWire-hosted journal article supplement (https://www.annfammed.org/highwire/filestream/8138/field_highwire_adjunct_files/0/Binns_Appendix.pdf)
Supplement: Binns_Appendix.pdf [file Binns_Appendix.pdf]

**Online Supplementary Material**

Binns HJ, Lanier D, Pace WD, et al. Describing primary care encounters: the Primary Care Network Survey and the National Ambulatory Medical Care Survey. *Ann Fam Med*. 2007;5(1):39-47.

<http://www.annfammed.org/cgi/content/full/5/1/39/DC1>

| <b>Supplemental Appendix. Table 1. 2001 NAMCS Definitions</b>                                                                                                                                                                                                                                                                                                            |                                                                                                                                                                                                                                                                                                                                                                                                                                                                                                                                              |
|--------------------------------------------------------------------------------------------------------------------------------------------------------------------------------------------------------------------------------------------------------------------------------------------------------------------------------------------------------------------------|----------------------------------------------------------------------------------------------------------------------------------------------------------------------------------------------------------------------------------------------------------------------------------------------------------------------------------------------------------------------------------------------------------------------------------------------------------------------------------------------------------------------------------------------|
| <b>Category</b>                                                                                                                                                                                                                                                                                                                                                          | <b>Definition</b>                                                                                                                                                                                                                                                                                                                                                                                                                                                                                                                            |
| Specialty type                                                                                                                                                                                                                                                                                                                                                           |                                                                                                                                                                                                                                                                                                                                                                                                                                                                                                                                              |
| Primary care specialists                                                                                                                                                                                                                                                                                                                                                 | General and/or family practice, internal medicine, adolescent medicine, pediatrics, pediatric sports medicine, adolescent medicine (internal medicine), gynecology, maternal and fetal medicine, obstetrics and gynecology, obstetrics, geriatric medicine (internal medicine), and sports medicine (internal medicine)                                                                                                                                                                                                                      |
| Specialty                                                                                                                                                                                                                                                                                                                                                                |                                                                                                                                                                                                                                                                                                                                                                                                                                                                                                                                              |
| General and/or family practice                                                                                                                                                                                                                                                                                                                                           | Family practice<br>Family practice, geriatric medicine<br>Sports medicine (family practice)<br>General practice                                                                                                                                                                                                                                                                                                                                                                                                                              |
| Internal medicine                                                                                                                                                                                                                                                                                                                                                        | Internal medicine                                                                                                                                                                                                                                                                                                                                                                                                                                                                                                                            |
| Pediatrics                                                                                                                                                                                                                                                                                                                                                               | Adolescent medicine<br>Critical care pediatrics<br>Developmental-behavioral pediatrics<br>Internal medicine/pediatrics<br>Neurodevelopmental disabilities<br>Neonatal-perinatal medicine<br>Pediatrics<br>Pediatric allergy<br>Pediatric cardiology<br>Pediatric endocrinology<br>Pediatric infectious diseases<br>Pediatric pulmonology<br>Medical toxicology<br>Pediatric emergency medicine<br>Pediatric gastroenterology<br>Pediatric hematology/oncology<br>Pediatric nephrology<br>Pediatric rheumatology<br>Pediatric sports medicine |
| NAMCS = National Ambulatory Medical Care Survey.                                                                                                                                                                                                                                                                                                                         |                                                                                                                                                                                                                                                                                                                                                                                                                                                                                                                                              |
| From: Centers for Disease Control and Prevention, National Center for Health Statistics. 2001 NAMCS Micro-Data File Documentation. P52-4. Available at: <a href="ftp://ftp.cdc.gov/pub/Health_Statistics/NCHS/Dataset_Documentation/NAMCS/doc01.pdf">ftp://ftp.cdc.gov/pub/Health_Statistics/NCHS/Dataset_Documentation/NAMCS/doc01.pdf</a> . Accessed: 13 January 2006. |                                                                                                                                                                                                                                                                                                                                                                                                                                                                                                                                              |

| <b>Supplemental Appendix. Table 2. Characteristics of PRINS Clinicians by Discipline</b> |                                             |                                 |                                             |                              |                                                |
|------------------------------------------------------------------------------------------|---------------------------------------------|---------------------------------|---------------------------------------------|------------------------------|------------------------------------------------|
| <b>Characteristic</b>                                                                    | <b>Percentage of Clinicians, Unweighted</b> |                                 |                                             |                              |                                                |
|                                                                                          | <b>All Clinicians<br/>(N = 900)</b>         | <b>Discipline*</b>              |                                             |                              |                                                |
|                                                                                          |                                             | <b>Physicians<br/>(n = 701)</b> | <b>Physician<br/>Residents<br/>(n = 84)</b> | <b>APNs/NPs<br/>(n = 87)</b> | <b>Physician's<br/>Assistants<br/>(n = 27)</b> |
| Specialty                                                                                |                                             |                                 |                                             |                              |                                                |
| Family practice/general practice                                                         | 58.8                                        | 53.1                            | 96.4                                        | 62.1                         | 77.8                                           |
| Internal medicine                                                                        | 13.7                                        | 15.7                            | 3.6                                         | 9.2                          | 7.4                                            |
| Pediatrics                                                                               | 23.1                                        | 27.5                            | 0                                           | 16.1                         | 3.7                                            |
| Other                                                                                    | 4.4                                         | 3.7                             | 0                                           | 12.6                         | 11.1                                           |
| Region                                                                                   |                                             |                                 |                                             |                              |                                                |
| Northeast                                                                                | 17.9                                        | 14.7                            | 3.6                                         | 58.6                         | 14.8                                           |
| Midwest                                                                                  | 24.9                                        | 30.9                            | 0                                           | 4.6                          | 11.1                                           |
| South                                                                                    | 30.6                                        | 26.5                            | 78.6                                        | 16.1                         | 29.6                                           |
| West                                                                                     | 26.7                                        | 27.8                            | 17.9                                        | 20.7                         | 44.4                                           |
| MSA status                                                                               |                                             |                                 |                                             |                              |                                                |
| MSA                                                                                      | 81.7                                        | 80.5                            | 97.6                                        | 75.9                         | 81.5                                           |
| Non-MSA                                                                                  | 16.0                                        | 17.6                            | 2.4                                         | 17.2                         | 14.8                                           |
| Missing                                                                                  | 2.3                                         | 2.0                             | 0                                           | 6.9                          | 3.7                                            |
| Sex                                                                                      |                                             |                                 |                                             |                              |                                                |
| Male                                                                                     | 52.4                                        | 58.8                            | 53.6                                        | 3.4                          | 44.4                                           |
| Female                                                                                   | 47.6                                        | 41.2                            | 46.4                                        | 96.6                         | 55.6                                           |
| Age                                                                                      |                                             |                                 |                                             |                              |                                                |
| < 50 years                                                                               | 73.8                                        | 71.2                            | 97.6                                        | 66.7                         | 88.9                                           |
| ≥50 years                                                                                | 24.6                                        | 27.4                            | 0                                           | 29.9                         | 11.1                                           |
| Missing                                                                                  | 1.7                                         | 1.4                             | 2.4                                         | 3.4                          | 0                                              |
| Ethnicity                                                                                |                                             |                                 |                                             |                              |                                                |
| Non-Hispanic                                                                             | 93.7                                        | 94.0                            | 90.5                                        | 93.1                         | 96.3                                           |
| Hispanic                                                                                 | 5.6                                         | 5.4                             | 8.3                                         | 4.6                          | 3.7                                            |
| Missing                                                                                  | 0.8                                         | 0.6                             | 1.1                                         | 2.3                          | 0                                              |
| Race                                                                                     |                                             |                                 |                                             |                              |                                                |
| White                                                                                    | 85.0                                        | 84.2                            | 80.9                                        | 93.1                         | 96.3                                           |
| Black/African American                                                                   | 3.8                                         | 4.4                             | 1.2                                         | 2.3                          | 0                                              |
| Asian                                                                                    | 9.0                                         | 9.4                             | 14.3                                        | 1.1                          | 3.7                                            |
| Native Hawaiian/other Pacific Islander                                                   | 0.4                                         | 0.4                             | 1.2                                         | 0                            | 0                                              |
| American Indian/Alaska Native                                                            | 0.2                                         | 0                               | 2.4                                         | 0                            | 0                                              |
| More than 1 race                                                                         | 0.7                                         | 0.4                             | 0                                           | 3.7                          | 0                                              |
| Missing                                                                                  | 0.9                                         | 1.1                             | 0                                           | 0                            | 0                                              |

Supplemental Appendix, Table 2 continues.

Online Supplementary Data

<http://www.annfammed.org/cgi/content/full/5/1/39/DC1>

Supplemental Appendix, Table 2 continued.

| Characteristic                   | Percentage of Clinicians, Unweighted |                         |                                    |                      |                                       |
|----------------------------------|--------------------------------------|-------------------------|------------------------------------|----------------------|---------------------------------------|
|                                  | All Clinicians<br>(N = 900)          | Discipline*             |                                    |                      |                                       |
|                                  |                                      | Physicians<br>(n = 701) | Physician<br>Residents<br>(n = 84) | APNs/NPs<br>(n = 87) | Physician's<br>Assistants<br>(n = 27) |
| Who owns this office (practice)? |                                      |                         |                                    |                      |                                       |
| Hospital                         | 38.2                                 | 36.1                    | 64.3                               | 25.3                 | 51.9                                  |
| Physician or physician group     | 39.3                                 | 43.1                    | 27.4                               | 27.6                 | 18.5                                  |
| Other health care corporation    | 15.6                                 | 14.1                    | 8.3                                | 31.0                 | 25.9                                  |
| Health maintenance organization  | 0.3                                  | 0.4                     | 0                                  | 0                    | 0                                     |
| Other                            | 4.3                                  | 4.6                     | 0                                  | 6.9                  | 3.7                                   |
| Blank                            | 2.2                                  | 1.7                     | 0                                  | 9.2                  | 0                                     |
| Employment status                |                                      |                         |                                    |                      |                                       |
| Owner                            | 19.4                                 | 24.7                    | 1.2                                | 1.2                  | 0                                     |
| Employee or contractor           | 79.4                                 | 74.2                    | 98.8                               | 96.5                 | 100                                   |
| Missing                          | 1.1                                  | 1.1                     | 0                                  | 2.3                  | 0                                     |

PRINS = Primary Care Network Survey; APN = advanced practice nurse; NP = nurse-practitioner; MSA = Metropolitan Statistical Area.  
 \* Discipline was missing for 1 clinician.

Online Supplementary Data

http://www.annfammed.org/cgi/content/full/5/1/39/DC1

| Characteristic                             | Percentage of Visits, UnWeighted |             |                     |          |                        |
|--------------------------------------------|----------------------------------|-------------|---------------------|----------|------------------------|
|                                            | All Clinicians                   | Discipline* |                     |          |                        |
|                                            |                                  | Physicians  | Physician Residents | APNs/NPs | Physician's Assistants |
| Sex                                        |                                  |             |                     |          |                        |
| Male                                       | 41.1                             | 44.6        | 34.1                | 22.4     | 44.0                   |
| Female                                     | 58.4                             | 54.9        | 65.8                | 76.8     | 55.5                   |
| Missing                                    | 0.5                              | 0.5         | 0.1                 | 0.8      | 0.5                    |
| Age, years                                 |                                  |             |                     |          |                        |
| ≤14                                        | 43.1                             | 47.8        | 20.5                | 22.2     | 38.1                   |
| 15-24                                      | 0.4                              | 8.9         | 16.0                | 9.8      | 15.4                   |
| 25-44                                      | 15.5                             | 14.0        | 33.7                | 19.1     | 24.4                   |
| 45-64                                      | 20.2                             | 17.3        | 24.1                | 36.2     | 14.9                   |
| 65-74                                      | 6.5                              | 6.0         | 3.3                 | 10.8     | 3.9                    |
| ≥75                                        | 4.6                              | 5.2         | 2.4                 | 1.7      | 2.8                    |
| Missing                                    | 0.7                              | 0.8         | 0.1                 | 0.3      | 0.6                    |
| Ethnicity                                  |                                  |             |                     |          |                        |
| Non-Hispanic                               | 84.7                             | 84.9        | 86.6                | 84.0     | 72.0                   |
| Hispanic                                   | 12.5                             | 12.2        | 12.7                | 13.3     | 27.0                   |
| Missing                                    | 2.8                              | 2.9         | 0.7                 | 2.7      | 1.0                    |
| Race                                       |                                  |             |                     |          |                        |
| White                                      | 61.0                             | 65.7        | 70.8                | 31.5     | 71.5                   |
| Black/African American                     | 25.4                             | 20.8        | 15.4                | 54.7     | 11.5                   |
| Asian                                      | 2.3                              | 2.5         | 3.3                 | 1.2      | 6.2                    |
| Native Hawaiian/other Pacific Islander     | 0.1                              | 0.2         | 0.2                 | 0.0      | 0.1                    |
| American Indian/Alaska Native              | 0.7                              | 0.7         | 1.3                 | 0.4      | 4.2                    |
| More than 1 race                           | 6.5                              | 6.8         | 7.6                 | 4.5      | 2.1                    |
| Missing                                    | 4.0                              | 3.5         | 1.4                 | 7.8      | 4.3                    |
| Insurance                                  |                                  |             |                     |          |                        |
| Private insurance                          | 47.2                             | 52.1        | 48.0                | 19.7     | 41.1                   |
| Medicare                                   | 9.7                              | 9.4         | 6.1                 | 12.1     | 5.6                    |
| Medicaid                                   | 25.2                             | 23.0        | 34.0                | 35.4     | 32.1                   |
| Self-pay                                   | 9.1                              | 7.9         | 6.5                 | 16.6     | 6.9                    |
| No charge                                  | 0.5                              | 0.5         | 0.1                 | 1.1      | 1.4                    |
| Worker's compensation                      | 0.3                              | 0.4         | 0.0                 | 0.4      | 0.1                    |
| Other                                      | 5.4                              | 4.1         | 2.2                 | 13.1     | 11.5                   |
| Don't know or missing                      | 2.5                              | 2.6         | 3.1                 | 1.7      | 1.4                    |
| Major reason for visit                     |                                  |             |                     |          |                        |
| Acute problem                              | 48.5                             | 48.0        | 42.7                | 52.5     | 52.2                   |
| Chronic problem, routine                   | 18.2                             | 18.8        | 20.3                | 14.3     | 22.6                   |
| Chronic problem, flare-up                  | 8.2                              | 6.1         | 9.3                 | 20.0     | 12.2                   |
| Presurgery or postsurgery/injury follow-up | 1.1                              | 1.2         | 1.4                 | 0.6      | 0.4                    |
| Nonillness care/preventive care            | 22.8                             | 24.8        | 25.4                | 12.2     | 11.3                   |
| Missing                                    | 1.1                              | 1.2         | 1.1                 | 0.4      | 1.3                    |

Supplemental Appendix, Table 3 continues.

**Online Supplementary Data**

<http://www.annfammed.org/cgi/content/full/5/1/39/DC1>

Supplemental Appendix, Table 3 continued.

| Characteristic                                     | Percentage of Visits, UnWeighted |            |                     |          |                        |
|----------------------------------------------------|----------------------------------|------------|---------------------|----------|------------------------|
|                                                    | Discipline*                      |            |                     |          |                        |
|                                                    | All Clinicians                   | Physicians | Physician Residents | APNs/NPs | Physician's Assistants |
| Clinician is this patient's primary care clinician |                                  |            |                     |          |                        |
| Yes                                                | 76.6                             | 79.8       | 50.2                | 67.3     | 36.6                   |
| No                                                 | 17.5                             | 15.3       | 38.6                | 22.2     | 60.3                   |
| Don't know                                         | 3.0                              | 3.0        | 10.3                | 1.3      | 2.4                    |
| Missing                                            | 2.9                              | 2.0        | 0.9                 | 9.2      | 0.7                    |

PRINS = Primary Care Network Survey; APN = advanced practice nurse; NP = nurse-practitioner.  
 \* Discipline was missing for 1 clinician.

| <b>Supplemental Appendix. Table 4. Services Provided in PRINS Patient Visits by Discipline</b> |                                       |                    |                            |                 |                               |
|------------------------------------------------------------------------------------------------|---------------------------------------|--------------------|----------------------------|-----------------|-------------------------------|
| <b>Characteristic</b>                                                                          | <b>Percentage of Visits, Weighted</b> |                    |                            |                 |                               |
|                                                                                                | <b>All Clinicians</b>                 | <b>Discipline*</b> |                            |                 |                               |
|                                                                                                |                                       | <b>Physicians</b>  | <b>Physician Residents</b> | <b>APNs/NPs</b> | <b>Physician's Assistants</b> |
| Any diagnostic or other assessment service performed                                           |                                       |                    |                            |                 |                               |
| Yes                                                                                            | 98.8                                  | 98.6               | 95.1                       | 99.9            | 98.8                          |
| No/missing                                                                                     | 1.2                                   | 1.4                | 4.9                        | 0.1             | 1.2                           |
| Physical examination performed                                                                 |                                       |                    |                            |                 |                               |
| Yes                                                                                            | 92.1                                  | 91.0               | 95.1                       | 97.7            | 92.3                          |
| No                                                                                             | 7.9                                   | 9.0                | 4.9                        | 2.3             | 7.7                           |
| Blood pressure performed                                                                       |                                       |                    |                            |                 |                               |
| Yes                                                                                            | 58.9                                  | 54.6               | 72.0                       | 81.0            | 49.1                          |
| No                                                                                             | 41.1                                  | 45.4               | 28.0                       | 19.0            | 50.9                          |
| Diagnostic or assessment services other than physical examination and blood pressure           |                                       |                    |                            |                 |                               |
| Yes                                                                                            | 87.1                                  | 85.6               | 93.2                       | 93.8            | 92.2                          |
| No/missing                                                                                     | 12.9                                  | 14.4               | 6.8                        | 6.2             | 7.8                           |
| Counseling/education services provided                                                         |                                       |                    |                            |                 |                               |
| Yes                                                                                            | 63.8                                  | 59.1               | 64.4                       | 91.3            | 59.2                          |
| No/missing                                                                                     | 36.2                                  | 40.9               | 35.6                       | 8.7             | 40.8                          |
| Diet/nutrition counseling/education provided                                                   |                                       |                    |                            |                 |                               |
| Yes                                                                                            | 37.7                                  | 34.4               | 32.1                       | 59.1            | 18.3                          |
| No                                                                                             | 62.3                                  | 65.6               | 67.9                       | 40.9            | 81.7                          |
| Growth/development counseling/education provided                                               |                                       |                    |                            |                 |                               |
| Yes                                                                                            | 14.4                                  | 16.1               | 6.5                        | 7.2             | 3.2                           |
| No                                                                                             | 85.6                                  | 83.9               | 93.5                       | 92.8            | 96.8                          |
| Tobacco use/exposure counseling/education provided                                             |                                       |                    |                            |                 |                               |
| Yes                                                                                            | 10.6                                  | 9.6                | 13.1                       | 15.9            | 10.0                          |
| No                                                                                             | 89.4                                  | 90.4               | 86.9                       | 84.1            | 90.0                          |

PRINS = Primary Care Network Survey; APN = advanced practice nurse; NP = nurse-practitioner.  
 \* Discipline was missing for 1 clinician.

**Supplemental Appendix. Table 5. Distribution of Visits for the Top 15 PRINS Diagnostic Clusters by Discipline**

| Diagnostic Cluster          | Percentage of Visits, Weighted |             |                     |          |                        |
|-----------------------------|--------------------------------|-------------|---------------------|----------|------------------------|
|                             | All Clinicians                 | Discipline* |                     |          |                        |
|                             |                                | Physicians  | Physician Residents | APNs/NPs | Physician's Assistants |
| Routine health maintenance  | 15.9                           | 17.5        | 12.6                | 8.0      | 5.9                    |
| Upper respiratory infection | 6.9                            | 7.9         | 3.8                 | 2.5      | 6.5                    |
| Hypertension                | 6.0                            | 5.6         | 4.3                 | 8.5      | 2.3                    |
| Otitis media                | 5.4                            | 5.8         | 3.0                 | 3.6      | 5.8                    |
| Diabetes mellitus           | 3.6                            | 3.0         | 2.6                 | 8.2      | 2.5                    |
| Depression or anxiety       | 2.2                            | 2.3         | 3.1                 | 1.4      | 0.8                    |
| Asthma                      | 2.1                            | 2.1         | 2.0                 | 1.3      | 11.0                   |
| Rhinitis                    | 2.1                            | 1.7         | 2.5                 | 3.2      | 10.5                   |
| Sinusitis                   | 1.9                            | 1.5         | 1.1                 | 4.6      | 2.5                    |
| Hyperlipidemia              | 1.9                            | 2.0         | 1.7                 | 1.6      | 0.7                    |
| Lower respiratory infection | 1.7                            | 1.1         | 0.8                 | 5.5      | 0.5                    |
| Eczema                      | 1.5                            | 1.6         | 1.2                 | 1.0      | 0.8                    |
| Peptic disease              | 1.4                            | 1.3         | 1.4                 | 1.9      | 0.9                    |
| Pregnancy-related           | 1.3                            | 1.1         | 7.9                 | 0.8      | 3.5                    |
| Nonfungal skin infections   | 1.3                            | 1.0         | 0.9                 | 3.2      | 2.3                    |

PRINS = Primary Care Network Survey; APN = advanced practice nurse; NP = nurse-practitioner.  
 \* Discipline was missing for 1 clinician.
